# Supplementary material for: Impact of prescription length supply policy on patient medication adherence in Thailand
Source: Springer Nature journal article supplement (doi:10.1186/s12913-023-09530-4), 2023-05-24
Supplement: MOESM2 [file 25400120]

## Supplementary Information

### Sensitivity Analysis

The results from sensitivity analysis in Supplementary Table 1,2 showed the same trend of pre-post changes of adherent in both type-2 diabetes and dyslipidemia patients with the higher threshold of medication adherence was set, the lesser patients can achieve the goal. For the adjusted logistic regression results displayed statistically significant with two thresholds of 0.5 and 0.6. These findings were exhibited in Supplementary Table 3.

Supplementary Table 1 Sensitivity analysis for MPR changed in type-2 diabetes patients using various threshold to determine adherence

| Type-2 diabetes patients | Propensity score matched |            |                |            |                |            |                |            |
|--------------------------|--------------------------|------------|----------------|------------|----------------|------------|----------------|------------|
|                          | MPR $\geq$ 0.5           |            | MPR $\geq$ 0.6 |            | MPR $\geq$ 0.7 |            | MPR $\geq$ 0.9 |            |
|                          | Int (400)                | Ctrl (400) | Int (400)      | Ctrl (400) | Int (400)      | Ctrl (400) | Int (400)      | Ctrl (400) |
| Pre-EDP                  | 38.8%                    | 40.0%      | 28.8%          | 29.0%      | 17.5%          | 16.3%      | 11.2%          | 10.5%      |
| Post-EDP                 | 57.8%                    | 56.8%      | 46.8%          | 44.5%      | 34.5%          | 29.5%      | 28.0%          | 21.8%      |
| Difference in %          | + 19.0%                  | + 16.8%    | + 18.0%        | + 15.5%    | + 17.0%        | + 13.2%    | + 16.8%        | + 11.3%    |
| <i>P</i> value           | < 0.001                  | < 0.001    | < 0.001        | < 0.001    | < 0.001        | < 0.001    | < 0.001        | < 0.001    |

Int, Intervention group; Ctrl, Control group

Supplementary Table 2 Sensitivity analysis for MPR changed in dyslipidemia patients using various threshold to determine adherence

| Dyslipidemia patients | Propensity score matched |            |                |            |                |            |                |            |
|-----------------------|--------------------------|------------|----------------|------------|----------------|------------|----------------|------------|
|                       | MPR $\geq$ 0.5           |            | MPR $\geq$ 0.6 |            | MPR $\geq$ 0.7 |            | MPR $\geq$ 0.9 |            |
|                       | Int (934)                | Ctrl (934) | Int (934)      | Ctrl (934) | Int (934)      | Ctrl (934) | Int (934)      | Ctrl (934) |
| Pre-EDP               | 31.9%                    | 36.0%      | 25.6%          | 27.9%      | 17.9%          | 20.0%      | 13.9%          | 15.3%      |
| Post-EDP              | 60.4%                    | 63.0%      | 52.8%          | 54.8%      | 44.9%          | 46.7%      | 38.3%          | 38.4%      |
| Difference in %       | + 28.5%                  | + 27.0%    | + 27.2%        | + 26.9%    | + 27.0%        | + 26.7%    | + 24.4%        | + 23.1%    |
| <i>P</i> value        | < 0.001                  | < 0.001    | < 0.001        | < 0.001    | < 0.001        | < 0.001    | < 0.001        | < 0.001    |

Int, Intervention group; Ctrl, Control group

Supplementary Table 3 Sensitivity analysis results showing EDP impacts on medication adherence.

| Variable              | Adherence threshold | Adjusted odds ratio | 95% CI    | <i>P</i> value |
|-----------------------|---------------------|---------------------|-----------|----------------|
| Intervention x Period | MPR $\geq$ 0.5      | 0.70                | 0.51-0.97 | 0.032          |
|                       | MPR $\geq$ 0.6      | 0.69                | 0.51-0.95 | 0.023          |
|                       | MPR $\geq$ 0.7      | 0.75                | 0.55-1.03 | 0.078          |
|                       | MPR $\geq$ 0.9      | 0.89                | 0.64-1.24 | 0.483          |
